# Supplementary material for: The Coronavirus Pandemic and the Occurrence of Psychosomatic Symptoms: Are They Related?
Source: PubMed Central journal article supplement (PMC8036614; doi:10.3390/ijerph18073570), 2021-03-30
Supplement: ijerph-18-03570-s001.pdf [file ijerph-18-03570-s001.pdf]

|                              |                     |                       |                     |                     |                      |                      |                     |                      |                       |
|------------------------------|---------------------|-----------------------|---------------------|---------------------|----------------------|----------------------|---------------------|----------------------|-----------------------|
| Student                      | 1.87<br>(0.98–3.55) | 0.85<br>(0.37–1.93)   | 1.28<br>(0.57–2.86) | 1.49<br>(0.65–3.42) | 1.55<br>(0.83–2.92)  | 2.02<br>(1.02–3.99)* | 1.63<br>(0.86–3.06) | 2.43<br>(1.17–5.06)* | 2.06<br>(0.61–7.00)   |
| Disabled/Old-aged pensioner  | 0.65<br>(0.39–1.07) | 0.44<br>(0.24–0.80)** | 1.07<br>(0.59–1.94) | 0.58<br>(0.30–1.13) | 0.59<br>(0.36–0.95)* | 0.95<br>(0.56–1.62)1 | 0.76<br>(0.47–1.22) | 0.83<br>(0.46–1.52)  | 0.90<br>(0.33–2.52)   |
| Employee                     | 0.97<br>(0.60–1.55) | 0.43<br>(0.25–0.76)** | 0.94<br>(0.53–1.66) | 0.56<br>(0.30–1.06) | 0.64<br>(0.41–1.01)  | 1.20<br>(0.73–1.99)  | 0.70<br>(0.44–1.10) | 0.77<br>(0.43–1.38)  | 0.71<br>(0.26–1.93)   |
| Self-employed                | 0.94<br>(0.45–1.94) | 0.81<br>(0.35–1.90)   | 1.25<br>(0.55–2.87) | 0.73<br>(0.27–2.00) | 0.92<br>(0.46–1.84)  | 0.72<br>(0.31–1.67)  | 0.68<br>(0.32–1.42) | 0.75<br>(0.29–1.91)  | 1.06<br>(0.25–4.58)   |
| Marital status               |                     |                       |                     |                     |                      |                      |                     |                      |                       |
| Single/Divorced/Widow(er)    | 1                   | 1                     | 1                   | 1                   | 1                    | 1                    | 1                   | 1                    | 1                     |
| Married/Partner relationship | 1.14<br>(0.86–1.51) | 0.96<br>(0.65–1.42)   | 0.99<br>(0.71–1.37) | 0.80<br>(0.54–1.20) | 0.86<br>(0.65–1.14)  | 0.82<br>(0.62–1.09)  | 0.82<br>(0.62–1.08) | 1.08<br>(0.76–1.53)  | 1.00<br>(0.56–1.83)   |
| Faith                        |                     |                       |                     |                     |                      |                      |                     |                      |                       |
| Non-religious                | 1                   | 1                     | 1                   | 1                   | 1                    | 1                    | 1                   | 1                    | 1                     |
| Religious                    | 1.24<br>(0.94–1.63) | 1.15<br>(0.78–1.69)   | 0.95<br>(0.68–1.32) | 1.07<br>(0.71–1.61) | 1.18<br>(0.89–1.57)  | 0.93<br>(0.70–1.23)  | 1.20<br>(0.91–1.58) | 1.17<br>(0.84–1.65)  | 1.56<br>(0.88–2.76)   |
| Spirituality                 | 1.00<br>(0.99–1.01) | 1.01<br>(1.00–1.02)*  | 1.00<br>(0.99–1.01) | 1.01<br>(0.99–1.02) | 1.01<br>(1.00–1.02)* | 1.00<br>(0.99–1.01)  | 1.01<br>(1.00–1.02) | 1.00<br>(0.99–1.01)  | 1.03<br>(1.01–1.04)** |

Notes: \*  $p < 0.05$ , \*\*  $p < 0.01$ , \*\*\*  $p < 0.001$ ; after using Bonferroni correction, only  $p$ -values below 0.01 are considered significant.
